# Supplementary material for: The DBB Family in Populus trichocarpa: Identification, Characterization, Evolution and Expression Profiles
Source: MDPI journal article supplement (doi:10.3390/molecules29081823), 2024-04-17
Supplement: s1 [file s1]

Table S2. The MEME motif sequences and lengths of PtrDBB proteins in *Populus trichocarp*.

| Motif | Width | Best possible match                                |
|-------|-------|----------------------------------------------------|
| 1     | 50    | MKIQCDVCEKAEATVFCCADEAALCDACDEKVHAANKLASKHQRVSLAHP |
| 2     | 36    | PKCDICQEAPAFFFCZEDRALLCRECDMPIHTAGEH               |
| 3     | 29    | THNRFLTGVKVELPSSKPGASSSSGQSP                       |
| 4     | 50    | ETRRGQNQPPKLTARENQRNRASVPMVENNSDGDGKVDKKLIDLNAKP   |
| 5     | 15    | STIPGWHVDDFLDPS                                    |
| 6     | 40    | NQQYGYPD LGGQKGD KKKGDS DCKANRR LADDEFDDPZC        |
| 7     | 50    | WLADMGLFGEQLPQEALAAAEVQLPISPPTNVNACRPPKFSMPHKKPRI  |
| 8     | 41    | TTPFGFCKIDDGLLPFMDAHDLERNMSSFSESGLWVPQA            |
| 9     | 46    | APVNSNPPAVPSTLSANTEINKGGDNLVTNEFGSTTSSTISEYLM      |
| 10    | 50    | GEKKTLETKSCPVSRRGTLLPLANPCNQVFPVNVCGVGEFGPAKLPSGG  |
