# Supplementary material for: The DBB Family in Populus trichocarpa: Identification, Characterization, Evolution and Expression Profiles
Source: MDPI journal article supplement (doi:10.3390/molecules29081823), 2024-04-17
Supplement: s1 [file s1]

Table S6.

(A) Expression level of *PtrDBB* genes in response to light/dark treatments.

| Time<br>Gene ID | light | dark |
|-----------------|-------|------|
| <i>PtrDBB1</i>  | 1     | 1    |
| <i>PtrDBB2</i>  | 1.73  | 1    |
| <i>PtrDBB3</i>  | 8.32  | 1    |
| <i>PtrDBB4</i>  | 2.6   | 1    |
| <i>PtrDBB5</i>  | 7.72  | 1    |
| <i>PtrDBB6</i>  | 1.56  | 1    |
| <i>PtrDBB7</i>  | 3.21  | 1    |
| <i>PtrDBB8</i>  | 2.15  | 1    |
| <i>PtrDBB9</i>  | 10.35 | 1    |
| <i>PtrDBB10</i> | 2.55  | 1    |
| <i>PtrDBB11</i> | 2.8   | 1    |
| <i>PtrDBB12</i> | 1.89  | 1    |

(B) Expression level of *PtrDBB* genes in response to drought stress.

| Time<br>Gene ID | 0h | 1h   | 3h   | 6h   | 12h   | 24h  |
|-----------------|----|------|------|------|-------|------|
| <i>PtrDBB1</i>  | 1  | 1.62 | 1.68 | 2.79 | 2.55  | 2.83 |
| <i>PtrDBB2</i>  | 1  | 1.53 | 3.58 | 2.21 | 2.32  | 3.11 |
| <i>PtrDBB3</i>  | 1  | 1    | 6.71 | 8.55 | 15.09 | 5.32 |
| <i>PtrDBB4</i>  | 1  | 3.68 | 3.62 | 4.78 | 2.67  | 3.92 |
| <i>PtrDBB5</i>  | 1  | 2.91 | 5.78 | 8.82 | 10.67 | 6.56 |
| <i>PtrDBB6</i>  | 1  | 1    | 4.77 | 7.32 | 12.19 | 8.29 |
| <i>PtrDBB7</i>  | 1  | 3.77 | 4.32 | 8.19 | 13.29 | 5.51 |
| <i>PtrDBB8</i>  | 1  | 3.53 | 2.99 | 2.82 | 4.85  | 3.58 |
| <i>PtrDBB9</i>  | 1  | 1.53 | 3.99 | 7.82 | 14.81 | 6.58 |
| <i>PtrDBB10</i> | 1  | 0.62 | 0.55 | 0.58 | 0.42  | 0.47 |
| <i>PtrDBB11</i> | 1  | 1.94 | 3.32 | 2.11 | 2.78  | 4.72 |
| <i>PtrDBB12</i> | 1  | 4.91 | 2.78 | 3.82 | 3.91  | 3.56 |

(C) Expression level of *PtrDBB* genes in response to ABA treatment.

| Time<br>Gene ID | 0h | 1h   | 3h   | 6h   | 12h  | 24h  |
|-----------------|----|------|------|------|------|------|
| <i>PtrDBB1</i>  | 1  | 0.62 | 0.68 | 3.79 | 2.55 | 2.83 |
| <i>PtrDBB2</i>  | 1  | 2.68 | 3.71 | 3.55 | 4.09 | 4.32 |
| <i>PtrDBB3</i>  | 1  | 1    | 2.71 | 3.55 | 4.09 | 4.32 |
| <i>PtrDBB4</i>  | 1  | 4.11 | 6.62 | 8.78 | 8.67 | 5.92 |
| <i>PtrDBB5</i>  | 1  | 2.91 | 5.78 | 8.82 | 9.91 | 6.56 |
| <i>PtrDBB6</i>  | 1  | 2.8  | 1.6  | 2.34 | 3.39 | 3.59 |
| <i>PtrDBB7</i>  | 1  | 0.82 | 1.73 | 2.31 | 2.02 | 1.58 |
| <i>PtrDBB8</i>  | 1  | 1.77 | 3.32 | 3.11 | 2.29 | 3.51 |

|                 |   |      |      |       |       |      |
|-----------------|---|------|------|-------|-------|------|
| <i>PtrDBB9</i>  | 1 | 3.53 | 3.99 | 7.82  | 14.85 | 6.58 |
| <i>PtrDBB10</i> | 1 | 2.91 | 5.78 | 8.82  | 12.91 | 8.56 |
| <i>PtrDBB11</i> | 1 | 2.46 | 6.32 | 10.11 | 12.29 | 3.51 |
| <i>PtrDBB12</i> | 1 | 4.91 | 5.78 | 6.82  | 8.91  | 5.56 |

(D) Expression level of *PtrDBB* genes in response to MeJA treatment.

| Time<br>Gene ID | 0h | 1h   | 3h    | 6h    | 12h   | 24h  |
|-----------------|----|------|-------|-------|-------|------|
| <i>PtrDBB1</i>  | 1  | 2.12 | 2.98  | 3.55  | 3.18  | 3.33 |
| <i>PtrDBB2</i>  | 1  | 2.89 | 1.56  | 3.37  | 4.83  | 2.67 |
| <i>PtrDBB3</i>  | 1  | 2.56 | 3.86  | 4.59  | 4.57  | 3.85 |
| <i>PtrDBB4</i>  | 1  | 0.79 | 0.83  | 1.46  | 1.83  | 2.22 |
| <i>PtrDBB5</i>  | 1  | 4.67 | 4.22  | 3.69  | 3.22  | 4.81 |
| <i>PtrDBB6</i>  | 1  | 6.85 | 8.55  | 13.41 | 7.22  | 5.31 |
| <i>PtrDBB7</i>  | 1  | 3.54 | 4.66  | 7.62  | 7.81  | 4.63 |
| <i>PtrDBB8</i>  | 1  | 1.89 | 2.33  | 2.51  | 3.31  | 3.78 |
| <i>PtrDBB9</i>  | 1  | 5.16 | 5.42  | 8.89  | 16.36 | 8.92 |
| <i>PtrDBB10</i> | 1  | 0.95 | 2.59  | 3.15  | 3.59  | 4.26 |
| <i>PtrDBB11</i> | 1  | 1    | 10.89 | 18.33 | 16.51 | 6.34 |
| <i>PtrDBB12</i> | 1  | 0.67 | 0.89  | 0.73  | 0.79  | 0.56 |
