# Supplementary material for: The DBB Family in Populus trichocarpa: Identification, Characterization, Evolution and Expression Profiles
Source: MDPI journal article supplement (doi:10.3390/molecules29081823), 2024-04-17
Supplement: s1 [file s1]

Table S1. Detailed information about *ZmGLK* genes in maize.

| Gene name                   | Sequences ID       | MW(Da)   | PI   | CDS Length(bp) | Size(aa) |
|-----------------------------|--------------------|----------|------|----------------|----------|
| <i>Populus trichocarp</i>   | Potri.001G384000.1 | 31852.75 | 5.75 | 894            | 297      |
|                             | Potri.002G028200.1 | 34336.37 | 5.79 | 933            | 310      |
|                             | Potri.004G161000.1 | 42102.84 | 5.97 | 621            | 378      |
|                             | Potri.004G162600.3 | 88462.73 | 5.75 | 612            | 791      |
|                             | Potri.005G117100.2 | 20506.21 | 7.05 | 555            | 184      |
|                             | Potri.005G234500.1 | 34288.43 | 6.20 | 936            | 311      |
|                             | Potri.007G015200.2 | 20515.17 | 6.23 | 558            | 185      |
|                             | Potri.007G130100.2 | 26022.39 | 4.80 | 708            | 235      |
|                             | Potri.009G122000.1 | 24021.86 | 6.39 | 654            | 217      |
|                             | Potri.009G124400.1 | 66923.85 | 7.44 | 612            | 596      |
|                             | Potri.011G105400.1 | 63262.02 | 6.07 | 897            | 579      |
|                             | Potri.017G028300.1 | 25989.39 | 4.77 | 717            | 238      |
| <i>Arabidopsis thaliana</i> | AT1G06040.1        | 27641.03 | 5.42 | 747            | 248      |
|                             | AT1G06040.2        | 19718.44 | 6.06 | 534            | 177      |
|                             | AT1G75540.1        | 35533.61 | 6.44 | 996            | 331      |
|                             | AT1G78600.1        | 32863.55 | 5.89 | 900            | 299      |
|                             | AT1G78600.2        | 35079.29 | 6.11 | 960            | 319      |
|                             | AT2G21320.1        | 18891.01 | 5.71 | 519            | 172      |
|                             | AT2G24790.2        | 24305.41 | 5.23 | 663            | 220      |
|                             | AT2G31380.1        | 26656.92 | 4.90 | 717            | 238      |
|                             | AT2G47890.2        | 26130.62 | 4.96 | 714            | 237      |
|                             | AT4G10240.1        | 17858.96 | 4.98 | 489            | 162      |
|                             | AT4G38960.1        | 20146.62 | 5.36 | 552            | 183      |
|                             | AT4G38960.3        | 25116.58 | 5.91 | 681            | 226      |
|                             | AT4G39070.1        | 26779.66 | 6.04 | 729            | 242      |
|                             | AT5G15840.2        | 30601.50 | 5.78 | 825            | 274      |
| <i>Oryza sativa</i>         | LOC_Os01g10580.1   | 37090.17 | 5.93 | 1074           | 357      |
|                             | LOC_Os02g39360.1   | 29148.43 | 4.93 | 816            | 271      |
|                             | LOC_Os02g43170.1   | 28235.40 | 5.36 | 810            | 269      |
|                             | LOC_Os02g43170.2   | 21619.04 | 5.18 | 627            | 208      |
|                             | LOC_Os04g41560.2   | 27136.68 | 4.89 | 774            | 257      |
|                             | LOC_Os04g41560.4   | 18937.53 | 5.47 | 546            | 181      |
|                             | LOC_Os04g45690.1   | 26733.80 | 5.12 | 753            | 250      |
|                             | LOC_Os05g11510.1   | 39399.78 | 5.48 | 1137           | 378      |
|                             | LOC_Os06g05890.1   | 38395.67 | 5.26 | 1083           | 360      |
|                             | LOC_Os06g49880.1   | 31914.66 | 5.08 | 927            | 308      |
|                             | LOC_Os06g49880.2   | 31786.53 | 5.08 | 924            | 307      |
|                             | LOC_Os09g35880.1   | 23366.18 | 5.90 | 636            | 211      |
|                             | LOC_Os12g10660.1   | 21629.79 | 4.99 | 633            | 210      |
| <i>Zea mays</i>             | GRMZM2G018876_P01  | 27665.26 | 4.87 | 780            | 259      |
|                             | GRMZM2G021777_P02  | 30470.81 | 4.54 | 903            | 300      |

|                       |                    |          |      |      |     |
|-----------------------|--------------------|----------|------|------|-----|
|                       | GRMZM2G028594_P01  | 40113.65 | 5.07 | 1128 | 375 |
|                       | GRMZM2G028594_P03  | 46942.63 | 5.29 | 1308 | 435 |
|                       | GRMZM2G070446_P01  | 40436.89 | 5.08 | 1128 | 375 |
|                       | GRMZM2G075562_P02  | 25112.18 | 5.26 | 699  | 232 |
|                       | GRMZM2G095299_P01  | 27476.02 | 5.82 | 765  | 254 |
|                       | GRMZM2G098442_P01  | 27913.67 | 4.80 | 771  | 256 |
|                       | GRMZM2G110541_P01  | 15378.82 | 9.56 | 429  | 142 |
|                       | GRMZM2G118884_P01  | 31873.54 | 4.73 | 927  | 308 |
|                       | GRMZM2G131982_P02  | 27823.72 | 5.19 | 777  | 258 |
|                       | GRMZM2G143718_P01  | 22716.35 | 5.42 | 621  | 206 |
|                       | GRMZM2G143718_P02  | 20617.18 | 5.50 | 558  | 185 |
|                       | GRMZM2G422644_P01  | 22545.25 | 5.54 | 618  | 205 |
|                       | GRMZM2G422644_P02  | 17737.94 | 9.21 | 471  | 156 |
|                       | GRMZM5G834596_P01  | 36806.01 | 5.30 | 1059 | 352 |
|                       | GRMZM5G834596_P03  | 36806.01 | 5.30 | 1059 | 352 |
|                       | GRMZM5G834596_P05  | 36806.01 | 5.30 | 1059 | 352 |
|                       | GRMZM5G834596_P06  | 36806.01 | 5.30 | 1059 | 352 |
| <i>Physcomitrella</i> | Pp3c11_20560       | 24828.00 | 6.20 | 666  | 221 |
| <i>patens</i>         | Pp3c14_10320       | 36188.00 | 7.02 | 1017 | 338 |
|                       | Pp3c17_14230       | 41253.64 | 6.79 | 1155 | 384 |
|                       | Pp3c17_6790        | 42815.99 | 5.85 | 1620 | 387 |
|                       | Pp3c7_25600        | 33423.11 | 5.28 | 1095 | 306 |
|                       | Pp3c7_5280         | 24551.67 | 6.26 | 663  | 220 |
| <i>Selaginella</i>    | 102790             | 10339.91 | 6.15 | 288  | 96  |
| <i>moellendorffii</i> | 111647             | 12151.10 | 6.86 | 336  | 111 |
|                       | 271535             | 30613.49 | 5.05 | 858  | 285 |
|                       | 444777             | 38352.35 | 8.50 | 1071 | 356 |
| <i>Picea abies</i>    | MA_10433513g0010   | 19287.64 | 7.10 | 498  | 174 |
|                       | MA_128658g0010     | 32059.09 | 5.93 | 996  | 293 |
| <i>Amborella</i>      | scaffold000001.223 | 27245.76 | 6.40 | 738  | 245 |
| <i>trichopoda</i>     | scaffold00099.135  | 20837.29 | 6.21 | 561  | 186 |
|                       | scaffold00182.23   | 25484.70 | 6.50 | 684  | 227 |
