# Supplementary material for: The DBB Family in Populus trichocarpa: Identification, Characterization, Evolution and Expression Profiles
Source: MDPI journal article supplement (doi:10.3390/molecules29081823), 2024-04-17
Supplement: s1 [file s1]

Table S4. The primers of qRT-PCR of 12 *PtrDBBs* and *Ptr18S*.

| Genes           |          | Primers used in qRT-PCR(5'→3') |
|-----------------|----------|--------------------------------|
| <i>PtrDBB1</i>  | Forwards | GATAGTGGCAAACACGGGGA           |
|                 | Reverse  | GAGCTATCTGGCACCTGACC           |
| <i>PtrDBB2</i>  | Forwards | ACGAGCATACCCAGAAGCAC           |
|                 | Reverse  | CAGGAACGAGATCACCACCA           |
| <i>PtrDBB3</i>  | Forwards | GACAGCATCAGCAACAACGG           |
|                 | Reverse  | AAAATCATCGATGCGCCAGC           |
| <i>PtrDBB4</i>  | Forwards | CCTGCGACGAGAAGGTTTCAT          |
|                 | Reverse  | GCAGAGCGAACTGCCATCTA           |
| <i>PtrDBB5</i>  | Forwards | ACCCTTTGTGACGCTTGTGA           |
|                 | Reverse  | TTCCTGGGATTCGCCAGAC            |
| <i>PtrDBB6</i>  | Forwards | ACAGCAAACGAGCATACCCA           |
|                 | Reverse  | GCCACTACTGGTAACGGAGG           |
| <i>PtrDBB7</i>  | Forwards | CTGATGAGGCTGCACTTTGC           |
|                 | Reverse  | TCACTGGGATTTGCCAGACC           |
| <i>PtrDBB8</i>  | Forwards | GGAAATTGGTGCGCATGGAG           |
|                 | Reverse  | TGGCTCAGTCTCAGTTGCAG           |
| <i>PtrDBB9</i>  | Forwards | TTTCTGGCCACTGGAATCCG           |
|                 | Reverse  | AAAACTCGATGCATGCTGCC           |
| <i>PtrDBB10</i> | Forwards | AGCTGATGAAGCCGCTCTTT           |
|                 | Reverse  | CTGTGGAACAGCGCTAGGAT           |
| <i>PtrDBB11</i> | Forwards | GGCAGTTCCCCAAATCCCTT           |
|                 | Reverse  | TGCCACGCTGTTCAGTGTA            |
| <i>PtrDBB12</i> | Forwards | TCGAGTTGCTCCAAGGACAC           |
|                 | Reverse  | AGCAAGTCATCAACTGCCCA           |
| <i>Ptr18S</i>   | Forwards | AAAATCATTGTAGGCCATTGTCG        |
|                 | Reverse  | ACTAAATTAAGCCAGCGGGAGTG        |
